# Supplementary material for: Laparoscopic Cholecystectomy in Children: The Experience of Two Centers Focusing on Indications and Timing in the Era of “New Technologies”
Source: MDPI journal article supplement (doi:10.3390/children10111771), 2023-10-31
Supplement: s1 [file s1]

Table S1: The detailed scoring system

| <i><b>Variables</b></i> | <i><b>Specific features</b></i>                                                                                                                                                                                                                                                                                                                                                                                                                             |
|-------------------------|-------------------------------------------------------------------------------------------------------------------------------------------------------------------------------------------------------------------------------------------------------------------------------------------------------------------------------------------------------------------------------------------------------------------------------------------------------------|
| <i>Clinical</i>         | <ul style="list-style-type: none"> <li>- symptom duration &gt; 7 days</li> <li>- local Murphy sign</li> <li>- concomitant hematological disease</li> <li>- overweight / obesity</li> <li>- previous lithotherapy</li> </ul>                                                                                                                                                                                                                                 |
| <i>Ultrasounds</i>      | <ul style="list-style-type: none"> <li>- multiple calculi</li> <li>- sonographic Murphy sign</li> <li>- sliding calculus</li> <li>- pericholecystic fluid</li> <li>- biliary tree calculi</li> <li>- gallbladder wall thickening &gt; 3 mm</li> <li>- gallstone &gt; 3 mm</li> <li>- gallbladder distension</li> <li>- biliary tree calculi/biliary tree dilatation</li> <li>- hepato/splenomegaly</li> <li>- lymph nodes in the hepatic pedicle</li> </ul> |
| <i>Surgical</i>         | <ul style="list-style-type: none"> <li>- gallbladder adhesions &gt;50%</li> <li>- gallbladder distension</li> <li>- gallbladder unable to grasp</li> <li>- stone impact</li> <li>- signs of inflammation</li> <li>- time to identify cystic artery/duct &gt; 90min</li> </ul>                                                                                                                                                                               |
| <i>Histological</i>     | <ul style="list-style-type: none"> <li>- Ulcers and/or erosion</li> <li>- Inflammatory cell infiltration</li> <li>- Fibrosis</li> <li>- Adenomyosis</li> <li>- Reactive epithelial hyperplasia</li> <li>- Epithelial atrophy</li> <li>- Parietal atrophy</li> <li>- Intramural microlitiasis</li> <li>- Intestinal metaplasia</li> </ul>                                                                                                                    |

For each parameter, a dichotomous variable was created (0 = absence; 1 = presence); for histological features, a severity grade (1-2-3) was further added
